# Supplementary material for: Towards high-throughput parallel imaging and single-cell transcriptomics of microbial eukaryotic plankton
Source: PubMed Central journal article supplement (PMC10798536; doi:10.1371/journal.pone.0296672), 2024-01-19
Supplement: pone.0296672.s001.pdf [file pone.0296672.s001.pdf]

*P. tricornutum*

*Heterocapsa* sp.

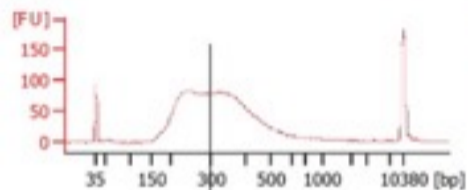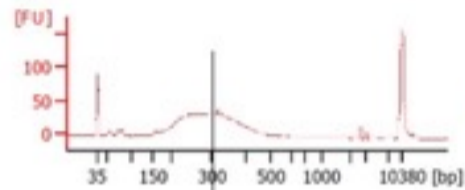

→ Formaldehyde

Average product length usually below 400 bp

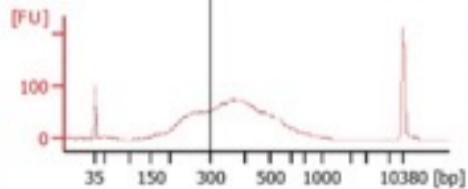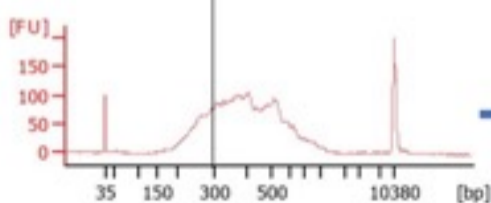

→ Methanol

Average product length usually above 400 bp
