# Supplementary material for: Towards high-throughput parallel imaging and single-cell transcriptomics of microbial eukaryotic plankton
Source: PubMed Central journal article supplement (PMC10798536; doi:10.1371/journal.pone.0296672), 2024-01-19

## Pre-fixed

*Heterocapsa* spp.

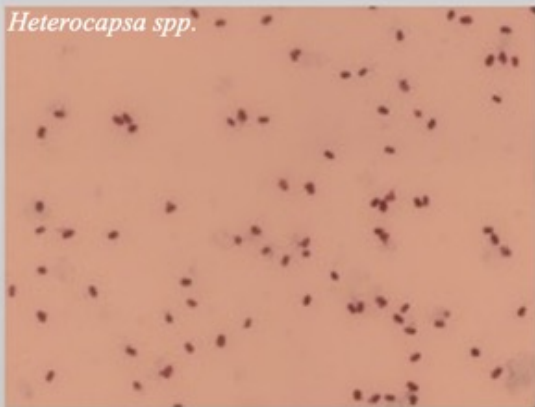

## Fixed on the slide

*Heterocapsa* spp.

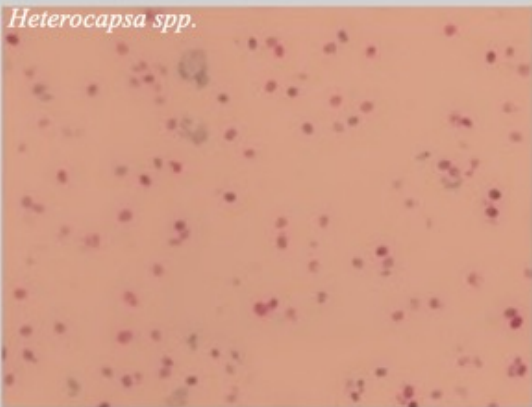

*P. tricornutum*

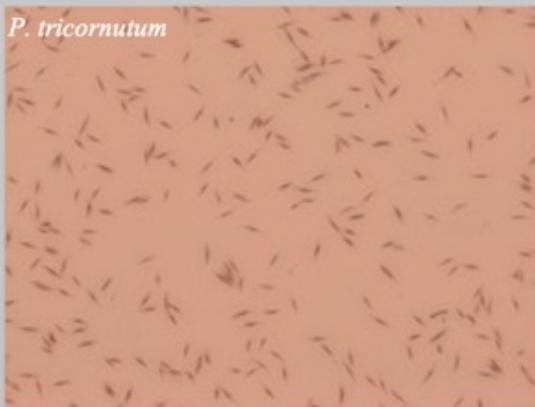

*P. tricornutum*

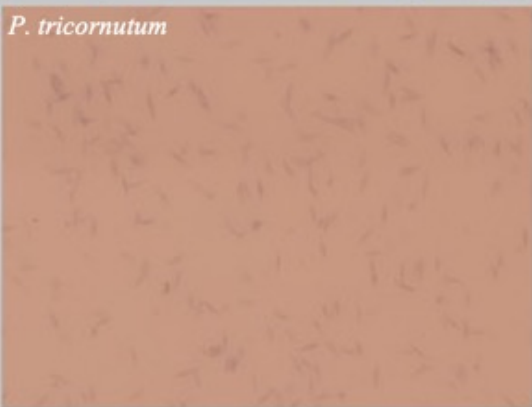

Supplement: pone.0296672.s002.pdf [file pone.0296672.s002.pdf]
