# Supplementary material for: Towards high-throughput parallel imaging and single-cell transcriptomics of microbial eukaryotic plankton
Source: PubMed Central journal article supplement (PMC10798536; doi:10.1371/journal.pone.0296672), 2024-01-19

**A**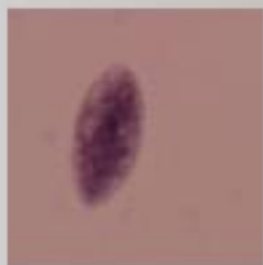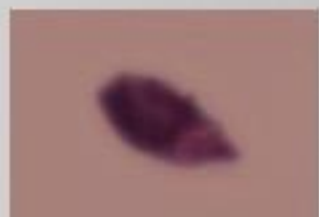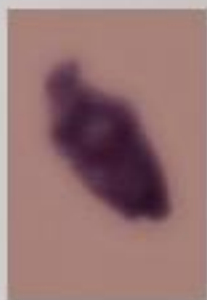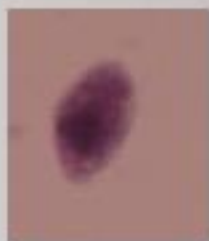**B**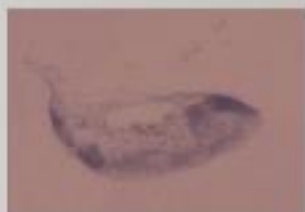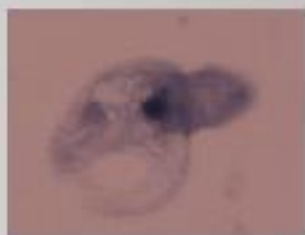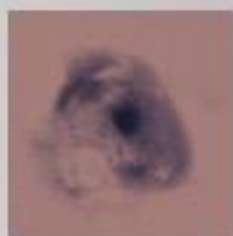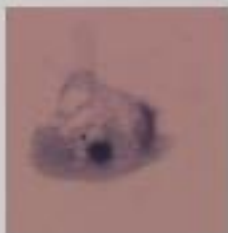

Supplement: pone.0296672.s004.pdf [file pone.0296672.s004.pdf]
