# Supplementary material for: Towards high-throughput parallel imaging and single-cell transcriptomics of microbial eukaryotic plankton
Source: PubMed Central journal article supplement (PMC10798536; doi:10.1371/journal.pone.0296672), 2024-01-19
Supplement: pone.0296672.s005.pdf [file pone.0296672.s005.pdf]

| <b>Reagent</b>     | <b>Concentration</b>   | <b>Temperature</b> | <b>Time</b>                       |
|--------------------|------------------------|--------------------|-----------------------------------|
| Lysozyme solution* | 10 mg/ml               | 37° C              | 30 min<br>60 min                  |
| HCl                | 0.01M                  | 37° C              | 10 min<br>20 min                  |
| Pepsin#            | 0.1 g ml <sup>-1</sup> | 37° C              | 1 min<br>3 min<br>5 min<br>10 min |

\* To prepare lysozyme solution add 100 mg lysozyme to 1 ml 0,5 M EDTA (pH 8), 1 ml 1M Tris/HCl (pH 8) and 8 ml nuclease free water

# Diluted 1:100 in 0.1M HCl
