# Supplementary material for: Towards high-throughput parallel imaging and single-cell transcriptomics of microbial eukaryotic plankton
Source: PubMed Central journal article supplement (PMC10798536; doi:10.1371/journal.pone.0296672), 2024-01-19
Supplement: pone.0296672.s006.pdf [file pone.0296672.s006.pdf]

| Background | Transcripts | Mean   | Tet1        | Tet2        | Pha         | Het         |
|------------|-------------|--------|-------------|-------------|-------------|-------------|
|            |             |        | 141,2       | 82,0        | 8,3         | 244,9       |
|            |             | Median | 127         | 61          | 5           | 226         |
|            | Genes       | Mean   | 125,6       | 71,4        | 5,0         | 226,4       |
|            |             | Median | 115         | 56          | 4           | 214         |
| Singles    | Transcripts | Mean   | 171,4       | 254,5       | 7,5         | 338,1       |
|            |             | Median | 162         | 226         | 6           | 328         |
|            | Genes       | Mean   | 147,6       | 194,3       | 4,7         | 305,8       |
|            |             | Median | 143         | 177         | 4           | 302         |
| Doubles    | Transcripts | Mean   | 220,7       | 365,3       | 9,1         | 399,7       |
|            |             | Median | 211         | 336         | 7           | 423         |
|            | Genes       | Mean   | 183,6       | 262,8       | 5,7         | 358,4       |
|            |             | Median | 175         | 254         | 5           | 384         |
| Clusters   | Transcripts | Mean   | 243,2       | 606,1       | 17,2        | 496,7       |
|            |             | Median | 223         | 518         | 10          | 339         |
|            | Genes       | Mean   | 197,4       | 392,1       | 8,4         | 407,3       |
|            |             | Median | 193         | 355         | 6           | 306         |
| Precision  |             |        | <b>0,22</b> | <b>0,73</b> | <b>0,17</b> | <b>0,31</b> |
